# Supplementary material for: Interaction between Obesity and the NFKB1 - 94ins/delATTG Promoter Polymorphism in Relation to Incident Acute Coronary Syndrome: A Follow Up Study in Three Independent Cohorts
Source: PLoS One. 2013 May 9;8(5):e63004. doi: 10.1371/journal.pone.0063004 (PMC3650017; doi:10.1371/journal.pone.0063004)
Supplement: Table S2 — Crude analyses. RR * with 95% confidence interval in brackets for the combined effect of obesity and the NFKB1-94ATTG polymophism in relation to acute coronary syndrome. Diet, Cancer and Health, Health Professionals Follow-up Study (HPFS), and Nurses Health Study (NHS). (XLS) [file pone.0063004.s002.xls]

## Sheet: Table S2
Table S2. Crude analyses. RR * with 95% confidence interval in brackets for the combined effect of obesity and the
NFKB1-94ATTG polymophism in relation to acute coronary syndrome.
Diet, Cancer and Health, Health Professionals Follow-up Study (HPFS), and Nurses Health Study (NHS).
	MEN		Diet, Cancer and Health¹							HPFS²
			NFKB1							NFKB1
	Variable		Wt/Wt		Wt/Variant		Variant/Variant			Wt/Wt		Wt/Variant		Variant/Variant
	Body mass index
	< 25.5 kg/m²		1 (ref.)		1.16 (0.86;1.56)		1.09 (0.73;1.63)			1 (ref.)		1.03 (0.72;1.48)		0.76 (0.44;1.30)
	25.5 - 29 kg/m²		1.13 (0.85;1.50)		1.37 (1.04;1.80)		1.64 (1.18;2.27)			1.20 (0.79;1.83)		1.59 (1.08;2.35)		1.04 (0.59;1.84)
	> 29 kg/m²		1.46 (1.07;1.99)		1.60 (1.19;2.15)		1.82 (1.24;2.68)			1.00 (0.57;1.74)		1.88 (1.14;3.11)		1.58 (0.73;3.46)
	Waist circumference
	< 94 cm		1 (ref.)		1.13 (0.87;1.48)		1.04 (0.72;1.51)			1 (ref.)		1.05 (0.66;1.60)		0.82 (0.43;1.54)
	94 - 102 cm		1.14 (0.85;1.52)		1.41 (1.08;1.84)		1.65 (1.20;2.28)			1.30 (0.81;2.11)		1.15 (0.73;1.81)		0.73 (0.35;1.51)
	> 102 cm		1.60 (1.16;2.21)		1.76 (1.28;2.43)		2.17 (1.46;3.22)			0.95 (0.54;1.65)		1.50 (0.91;2.46)		1.12 (0.60;2.12)
	Hip circumference
	> 103.5 cm		1 (ref.)		1.20 (0.92;1.58)		1.51 (1.08;2.12)			1 (ref.)		1.32 (0.87;2.01)		1.16 (0.66;2.03)
	98 - 103.5 cm		1.00 (0.74;1.36)		1.08 (0.81;1.42)		1.50 (1.08;2.10)			1.34 (0.81;2.22)		1.53 (0.94;2.48)		0.78 (0.38;1.58)
	< 98 cm		1.19 (0.86;1.65)		1.46 (1.07;2.00)		1.04 (0.67;1.60)			1.30 (0.75;2.24)		1.12 (0.67;1.90)		0.91 (0.42;1.96)
	WOMEN		Diet, Cancer and Health¹							NHS²
			NFKB1							NFKB1
	Variable		Wt/Wt		Wt/Variant		Variant/Variant			Wt/Wt		Wt/Variant		Variant/Variant
	Body mass index
	< 24 kg/m²		1 (ref.)		0.79 (0.49;1.28)		0.61 (0.29;1.31)			1 (ref.)		0.96 (0.65;1.41)		1.01 (0.59;1.72)
	24 - 28 kg/m²		1.01 (0.60;1.70)		1.17 (0.75;1.82)		0.87 (0.44;1.72)			1.23 (0.79;1.91)		1.23 (0.82;1.85)		1.31 (0.77;2.23)
	> 28 kg/m²		1.31 (0.80;2.14)		1.64 (1.04;2.59)		2.50 (1.39;4.48)			1.82 (1.18;2.79)		2.27 (1.47;3.49)		1.69 (0.90;3.20)
	Waist circumference
	< 80 cm		1 (ref.)		0.84 (0.52;1.35)		0.79 (0.40;1.58)			1 (ref.)		0.86 (0.58;1.28)		0.97 (0.57;1.66)
	80 - 91 cm		1.72 (1.02;2.91)		1.75 (1.09;2.83)		1.08 (0.53;2.18)			0.88 (0.52;1.49)		0.71 (0.41;1.22)		0.72 (0.36;1.46)
	> 91 cm		2.15 (1.16;4.00)		3.65 (2.08;6.42)		6.89 (3.32;14.3)			1.28 (0.68;2.40)		2.11 (1.09;4.09)		1.50 (0.62;3.66)
	Hip circumference
	> 104 cm		1 (ref.)		1.26 (0.77;2.08)		1.37 (0.66;2.85)			1 (ref.)		1.26 (0.78;2.03)		0.82 (0.43;1.56)
	98 - 104 cm		1.55 (0.87;2.76)		1.63 (0.96;2.76)		2.09 (1.13;3.86)			0.97 (0.52;1.79)		1.02 (0.56;1.84)		1.12 (0.51;2.46)
	< 98 cm		2.58 (1.42;4.67)		2.41 (1.37;4.24)		1.50 (0.65;3.48)			1.55 (0.89;2.71)		1.12 (0.64;1.95		1.04 (1.02;1.06)
	Waist circumference and hip circumference mutually adjusted.
	¹) Crude analyses. Age used as timeaxis.
	²) Crude analyses. Matced on age and smoking status.
	*) RR estimated by Cox proportional hazards regression in DCH and logistic regression in NHS and HPFS.
